# Supplementary material
Source: Springer Nature journal article supplement (https://www.springermedizin.de/resource/supplementary/12865_2013_578_MOESM4_ESM.pdf/9428274)

\*

p=0.0263

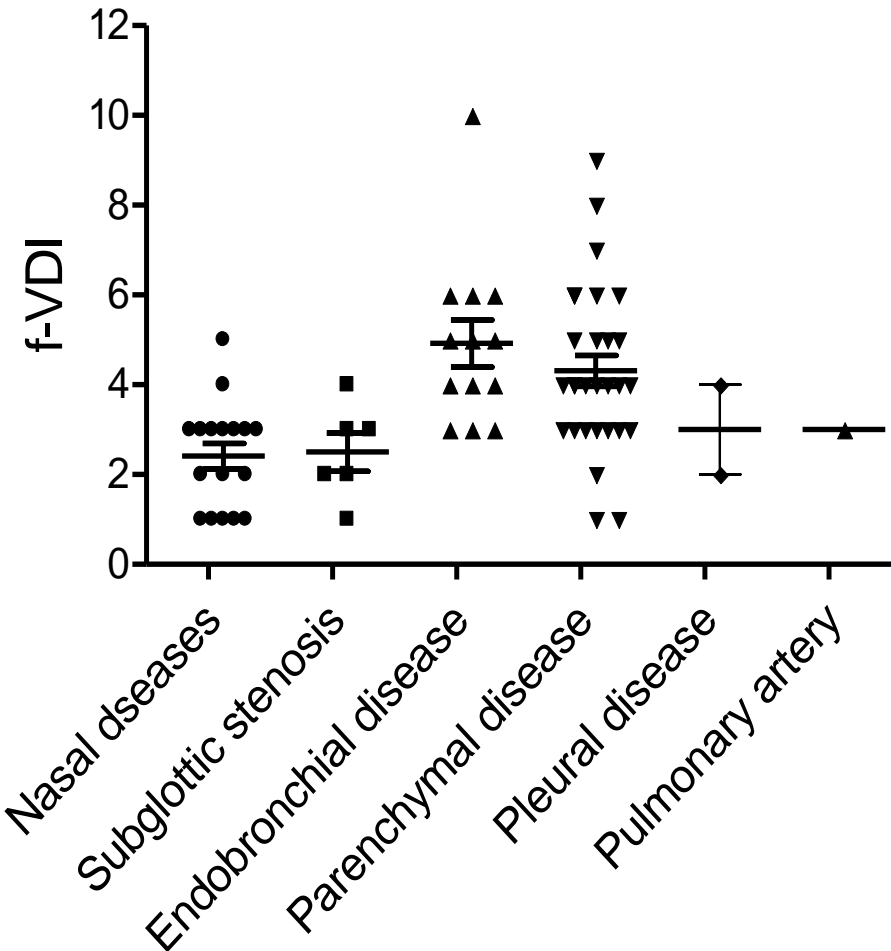

Supplement: MOESM4 [file 9428274]
